# Supplementary material for: Ovarian Blood Sampling Identifies Junction Plakoglobin as a Novel Biomarker of Early Ovarian Cancer
Source: PubMed Central journal article supplement (PMC7545354; doi:10.3389/fonc.2020.01767), 2020-09-25

**Supplementary Figure S1:** Saturation labelling DIGE of serum samples – IPG 3-10NL, 24 cm, 5 $\mu$ g protein load, SDS-PAGE: T=12.5%, S-200 channel.  
-O: Ovarian serum; -P: Peripheral serum. OvCa: Ovarian cancer

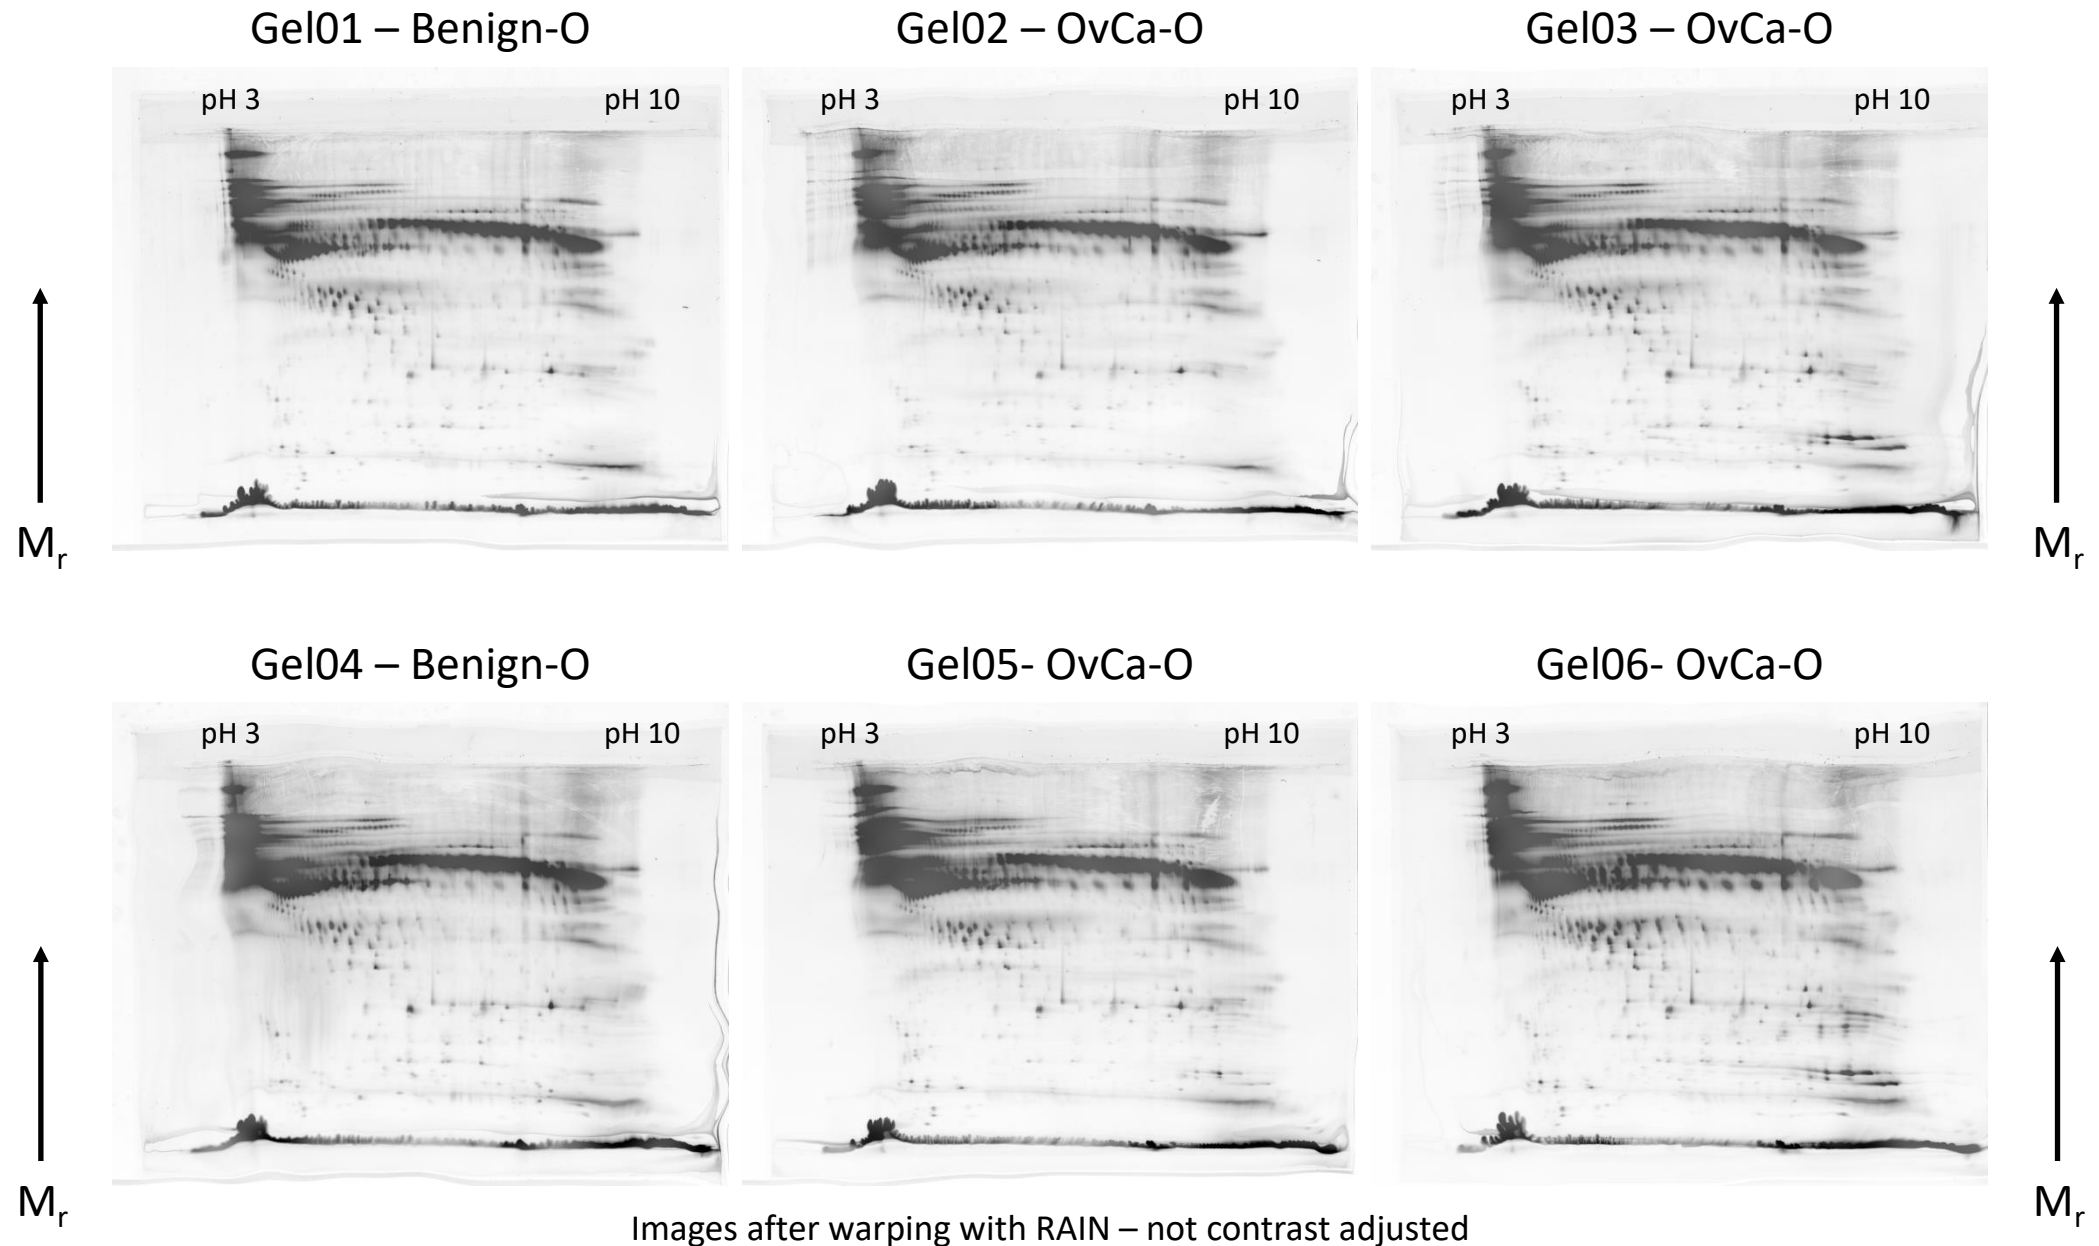

Images after warping with RAIN – not contrast adjusted

**Supplementary Figure S1:** Saturation labelling DIGE of serum samples – IPG 3-10NL, 24 cm, 5 $\mu$ g protein load, SDS-PAGE: T=12.5%, S-200 channel.  
-O: Ovarian serum; -P: Peripheral serum. OvCa: Ovarian cancer

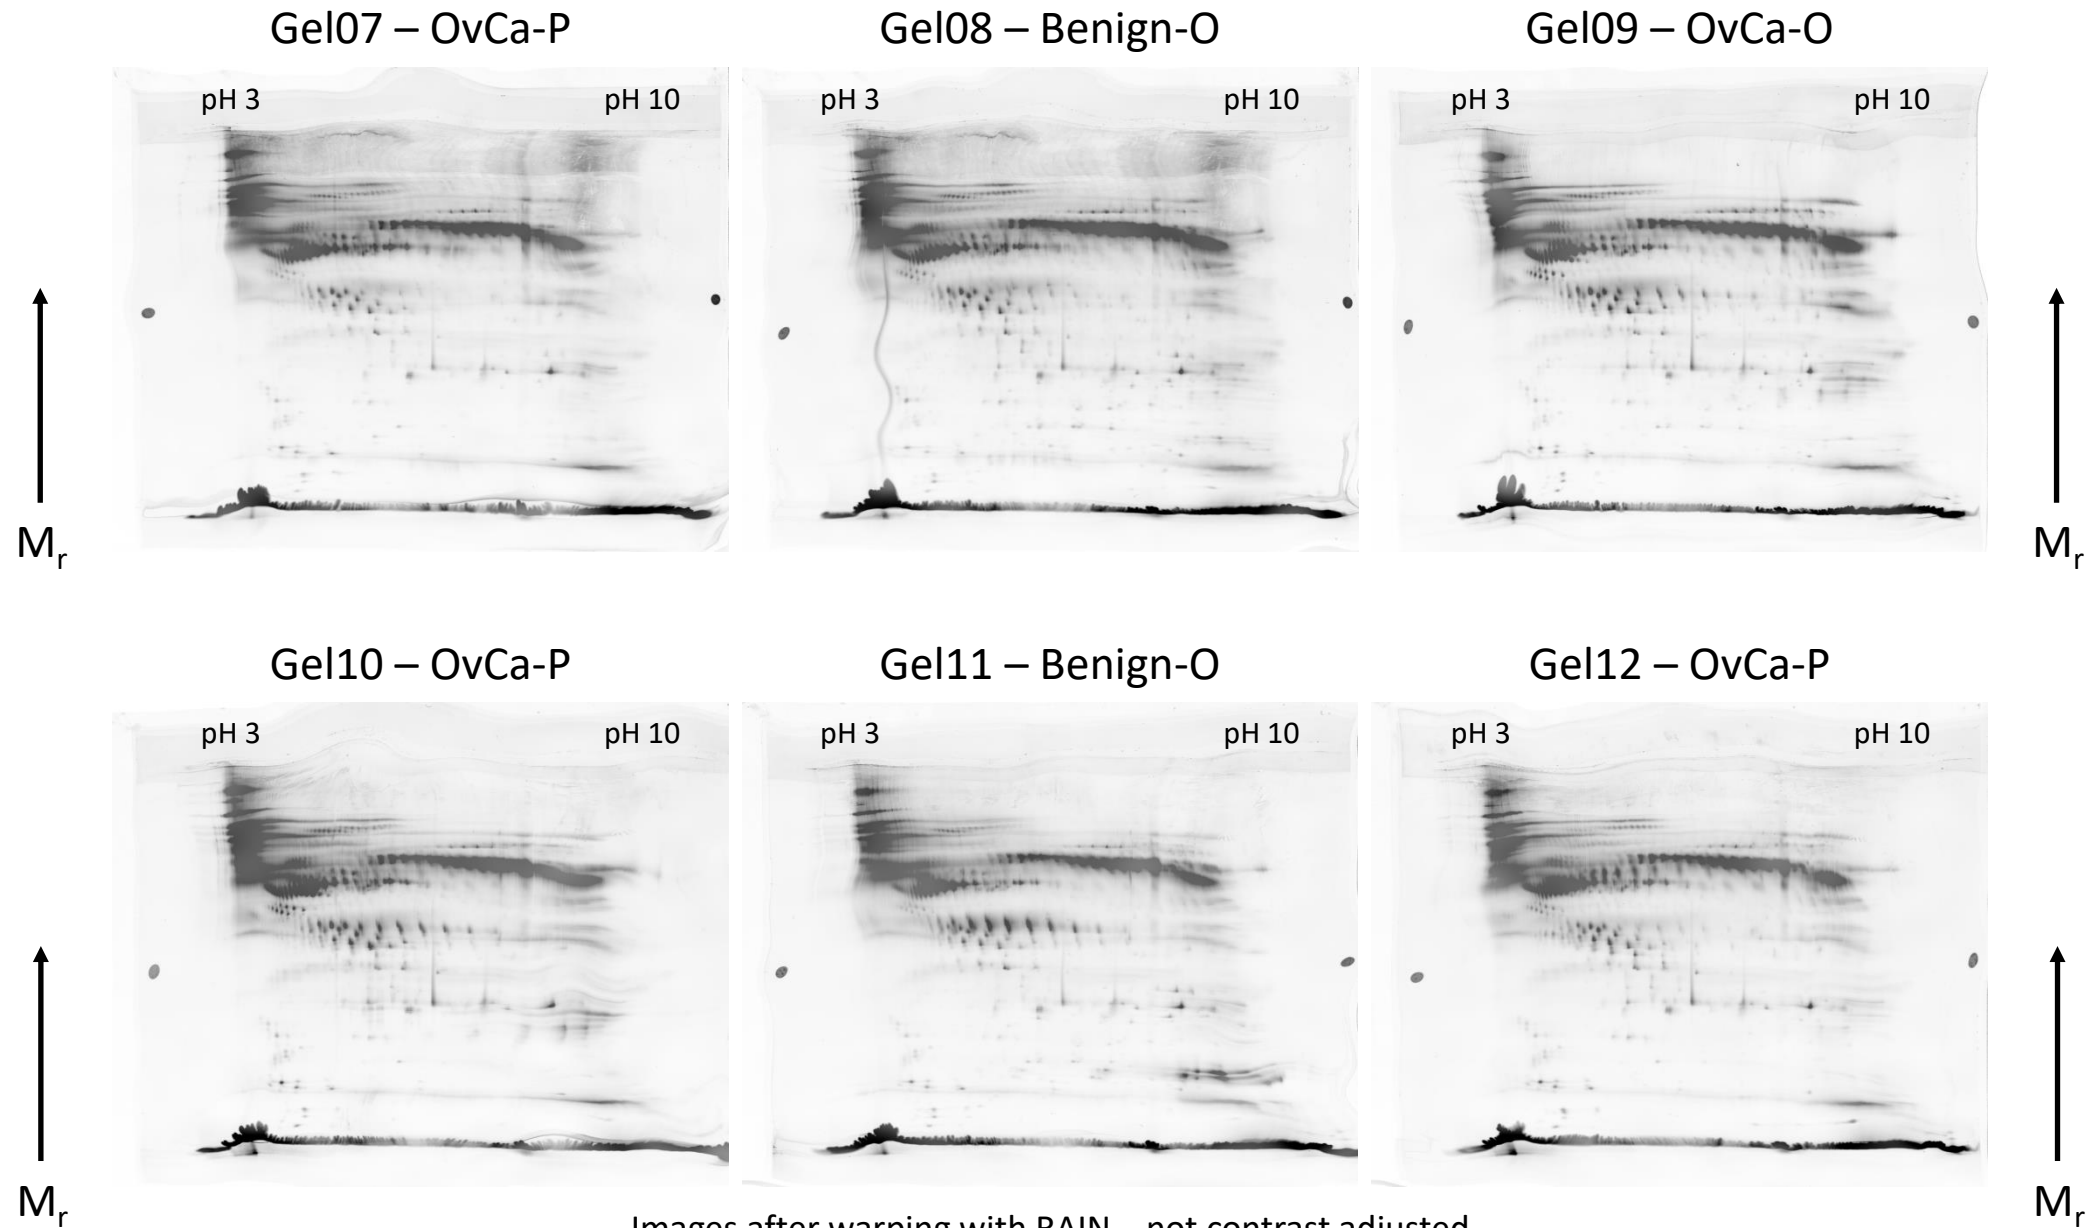

Images after warping with RAIN – not contrast adjusted

**Supplementary Figure S1:** Saturation labelling DIGE of serum samples – IPG 3-10NL, 24 cm, 5 $\mu$ g protein load, SDS-PAGE: T=12.5%, S-200 channel.  
-O: Ovarian serum; -P: Peripheral serum. OvCa: Ovarian cancer

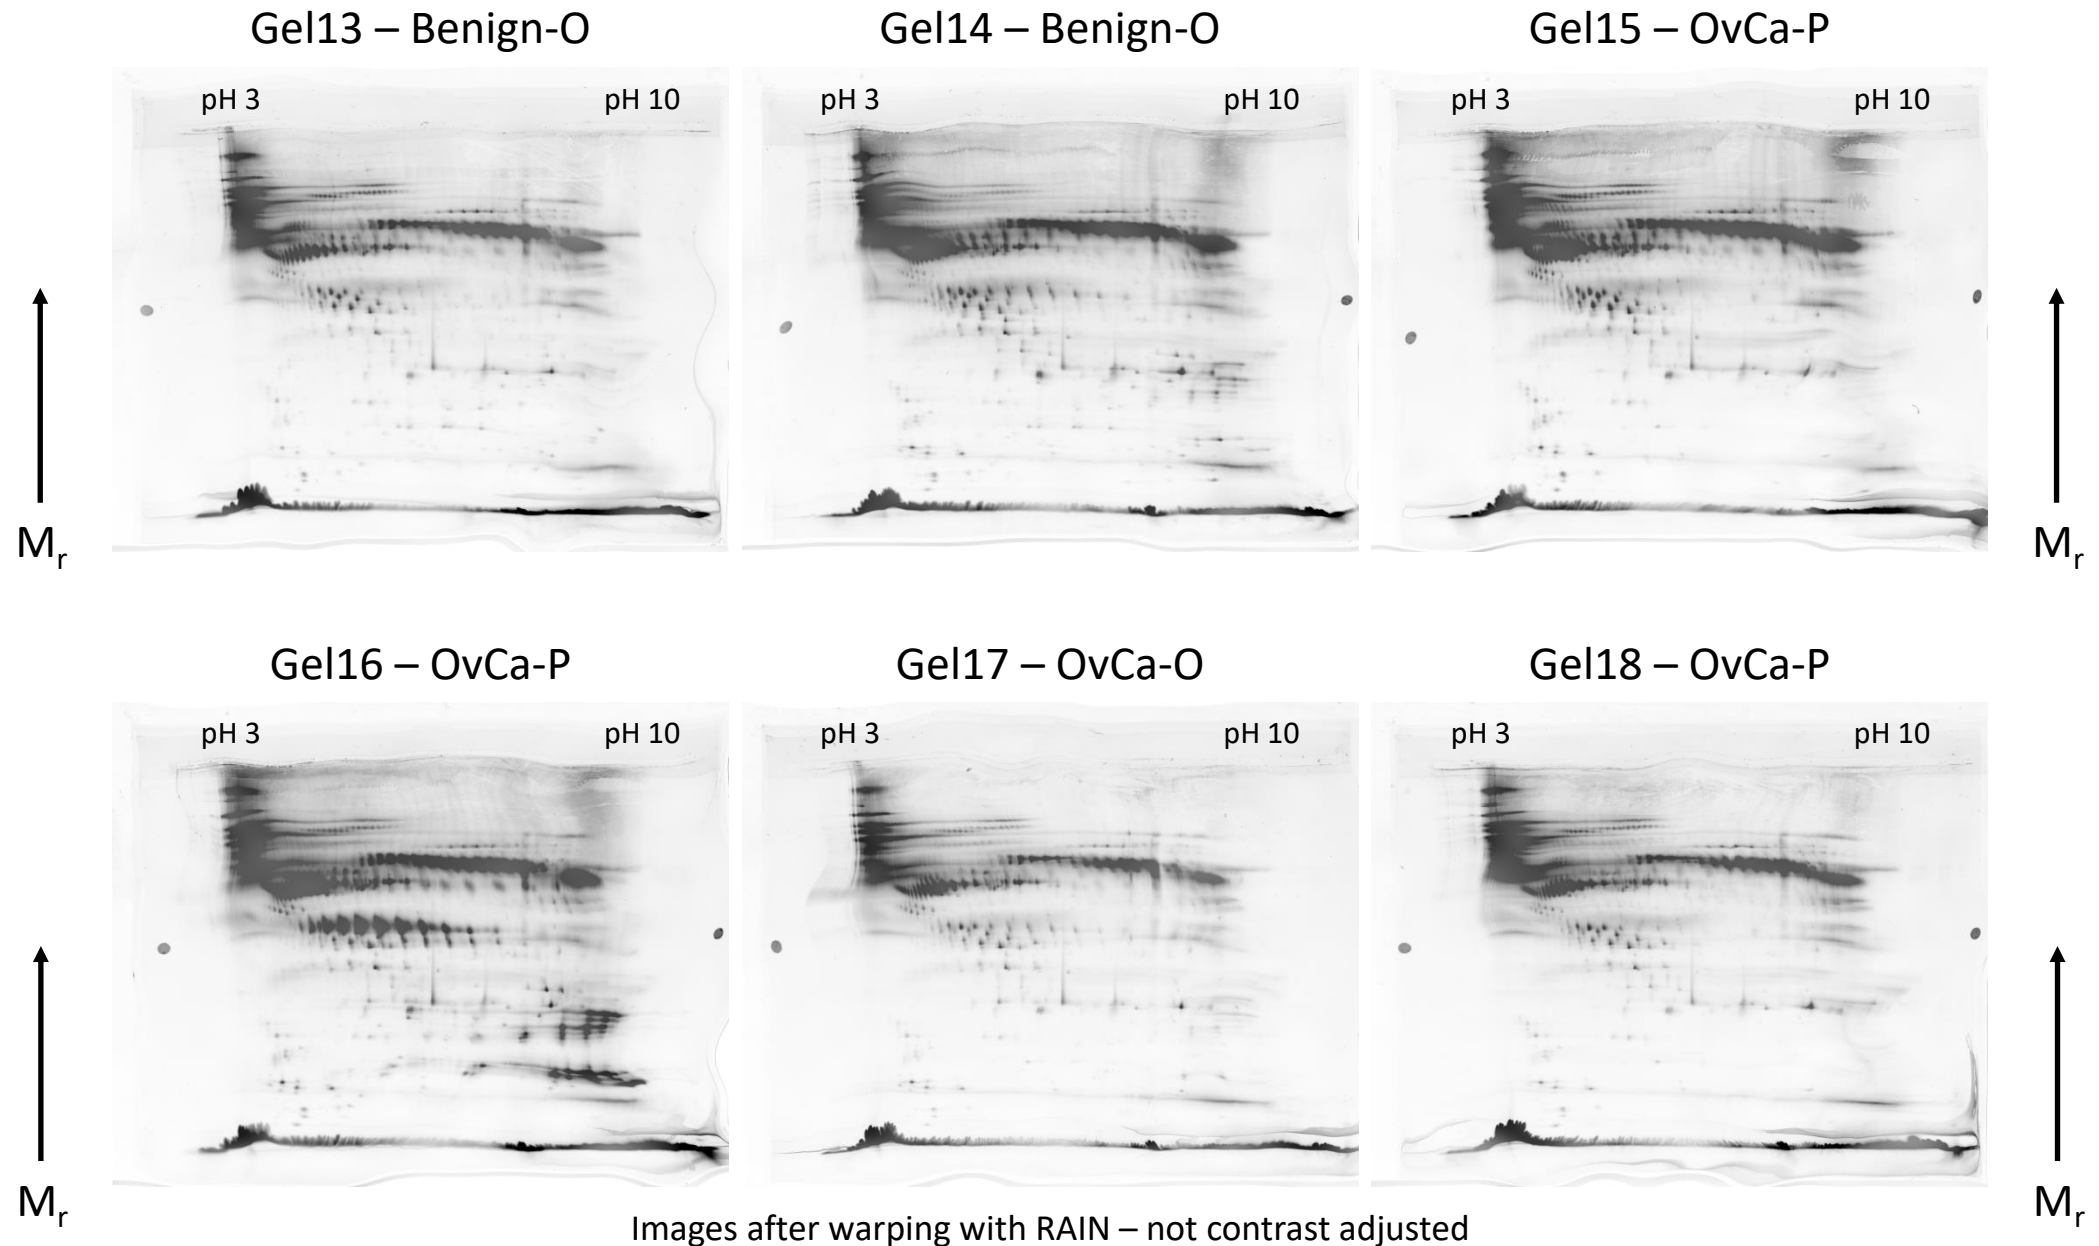

Supplement: Image_1.pdf [file Image_1.pdf]
