# Supplementary material for: Ovarian Blood Sampling Identifies Junction Plakoglobin as a Novel Biomarker of Early Ovarian Cancer
Source: Front Oncol. 2020 Sep 25;10:1767. doi: 10.3389/fonc.2020.01767 (PMC7545354; doi:10.3389/fonc.2020.01767)
Supplement: Supplementary file 3 [file Table_3.xlsx]

## Sheet: Spot736
Spot 736
Uniprot.Acc	Gene	Protein	MW	pI	Unique.peptides
P04264	KRT1	Keratin, type II cytoskeletal 1	66038	8.15	114
P35908	KRT2	Keratin, type II cytoskeletal 2 epidermal	65432	8.07	102
P13645	KRT10	Keratin, type I cytoskeletal 10	58826	5.13	81
P35527	KRT9	Keratin, type I cytoskeletal 9	62064	5.14	68
P13647	KRT5	Keratin, type II cytoskeletal 5	62378	7.58	30
P02533	KRT14	Keratin, type I cytoskeletal 14	51561	5.09	26
P08779	KRT16	Keratin, type I cytoskeletal 16	51267	4.98	22
P29622	SERPINA4	Kallistatin	48541	7.34	14
P14923	JUP	Junction plakoglobin	81744	5.75	10
Q04695	KRT17	Keratin, type I cytoskeletal 17	48105	4.97	9
P08571	CD14	Monocyte differentiation antigen CD14	40076	5.84	7
Q7Z794	KRT77	Keratin, type II cytoskeletal 1b	61901	5.73	6
Q08188	TGM3	Protein-glutamine gamma-glutamyltransferase E	76631	5.62	4
Q02413	DSG1	Desmoglein-1	113746	4.9	3
Q86YZ3	HRNR	Hornerin	282387	10.05	2
P02538	KRT6A	Keratin, type II cytoskeletal 6A	60044	8.09	2
P62805	H4C1	Histone H4	11367	11.36	2
P01008	SERPINC1	Antithrombin-III	52602	6.32	2
Q8N1N4	KRT78	Keratin, type II cytoskeletal 78	56865	5.79	2
Q9NXE8	CWC25	Pre-mRNA-splicing factor CWC25 homolog	49647	10.18	2
P35222	CTNNB1	Catenin beta-1	85496	5.53	2
P12273	PIP	Prolactin-inducible protein	16572	8.26	2

## Sheet: Spot1252
Spot 1252
Uniprot.Acc	Gene	Protein	MW	pI	Unique.peptides
P04264	KRT1	Keratin, type II cytoskeletal 1	66038	8.15	149
P35527	KRT9	Keratin, type I cytoskeletal 9	62064	5.14	125
P35908	KRT2	Keratin, type II cytoskeletal 2 epidermal	65432	8.07	123
P13645	KRT10	Keratin, type I cytoskeletal 10	58826	5.13	100
P13647	KRT5	Keratin, type II cytoskeletal 5	62378	7.58	23
P08779	KRT16	Keratin, type I cytoskeletal 16	51267	4.98	21
P02533	KRT14	Keratin, type I cytoskeletal 14	51561	5.09	18
P14923	JUP	Junction plakoglobin	81744	5.75	15
Q7Z794	KRT77	Keratin, type II cytoskeletal 1b	61901	5.73	11
Q08188	TGM3	Protein-glutamine gamma-glutamyltransferase E	76631	5.62	10
Q6UWP8	SBSN	Suprabasin	60540	6.5	8
Q04695	KRT17	Keratin, type I cytoskeletal 17	48105	4.97	8
Q5D862	FLG2	Filaggrin-2	248070	8.45	7
P15924	DSP	Desmoplakin	331770	6.44	7
Q02413	DSG1	Desmoglein-1	113746	4.9	6
Q86YZ3	HRNR	Hornerin	282387	10.05	4
P31944	CASP14	Caspase-14	27679	5.44	4
Q8N1N4	KRT78	Keratin, type II cytoskeletal 78	56865	5.79	3
P22735	TGM1	Protein-glutamine gamma-glutamyltransferase K	89786	5.68	2
P02538	KRT6A	Keratin, type II cytoskeletal 6A	60044	8.09	2
O75223	GGCT	Gamma-glutamylcyclotransferase	21007	5.07	2
P07339	CTSD	Cathepsin D	44552	6.1	2
Q15517	CDSN	Corneodesmosin	51522	8.69	2
P12273	PIP	Prolactin-inducible protein	16572	8.26	2
Q9NXE8	CWC25	Pre-mRNA-splicing factor CWC25 homolog	49647	10.18	2

## Sheet: Spot1295
Spot 1295
Uniprot.Acc	Gene	Protein	MW	pI	Unique.peptides
P13645	KRT10	Keratin, type I cytoskeletal 10	58826	5.13	221
P35908	KRT2	Keratin, type II cytoskeletal 2 epidermal	65432	8.07	187
P04264	KRT1	Keratin, type II cytoskeletal 1	66038	8.15	187
P35527	KRT9	Keratin, type I cytoskeletal 9	62064	5.14	103
P13647	KRT5	Keratin, type II cytoskeletal 5	62378	7.58	46
P02533	KRT14	Keratin, type I cytoskeletal 14	51561	5.09	24
P08779	KRT16	Keratin, type I cytoskeletal 16	51267	4.98	16
P14923	JUP	Junction plakoglobin	81744	5.75	11
Q02413	DSG1	Desmoglein-1	113746	4.9	11
Q7Z794	KRT77	Keratin, type II cytoskeletal 1b	61901	5.73	7
Q04695	KRT17	Keratin, type I cytoskeletal 17	48105	4.97	5
P12273	PIP	Prolactin-inducible protein	16572	8.26	5
Q08188	TGM3	Protein-glutamine gamma-glutamyltransferase E	76631	5.62	4
P04259	KRT6B	Keratin, type II cytoskeletal 6B	60066	8.09	4
O75223	GGCT	Gamma-glutamylcyclotransferase	21007	5.07	4
Q15517	CDSN	Corneodesmosin	51522	8.69	4
Q5D862	FLG2	Filaggrin-2	248070	8.45	2
Q07075	ENPEP	Glutamyl aminopeptidase	109243	5.31	2
P61626	LYZ	Lysozyme C	16537	9.38	2

## Sheet: Spot1507
Spot 1507
Uniprot.Acc	Gene	Protein	MW	pI	Unique.peptides
P04264	KRT1	Keratin, type II cytoskeletal 1	66038	8.15	273
P35908	KRT2	Keratin, type II cytoskeletal 2 epidermal	65432	8.07	235
P13645	KRT10	Keratin, type I cytoskeletal 10	58826	5.13	228
P35527	KRT9	Keratin, type I cytoskeletal 9	62064	5.14	150
P13647	KRT5	Keratin, type II cytoskeletal 5	62378	7.58	76
P02533	KRT14	Keratin, type I cytoskeletal 14	51561	5.09	45
P00915	CA1	Carbonic anhydrase 1	28870	6.59	28
P19013	KRT4	Keratin, type II cytoskeletal 4	57285	6.25	27
P08779	KRT16	Keratin, type I cytoskeletal 16	51267	4.98	21
Q7Z794	KRT77	Keratin, type II cytoskeletal 1b	61901	5.73	12
Q02413	DSG1	Desmoglein-1	113746	4.9	9
P11226	MBL2	Mannose-binding protein C	26143	5.39	8
P14923	JUP	Junction plakoglobin	81744	5.75	7
P13646	KRT13	Keratin, type I cytoskeletal 13	49588	4.91	5
Q08188	TGM3	Protein-glutamine gamma-glutamyltransferase E	76631	5.62	5
P06702	S100A9	Protein S100-A9	13242	5.71	5
Q04695	KRT17	Keratin, type I cytoskeletal 17	48105	4.97	4
Q07075	ENPEP	Glutamyl aminopeptidase	109243	5.31	4
P68871	HBB	Hemoglobin subunit beta	15998	6.74	3
P04792	HSPB1	Heat shock protein beta-1	22782	5.98	3
P04259	KRT6B	Keratin, type II cytoskeletal 6B	60066	8.09	2
Q5D862	FLG2	Filaggrin-2	248070	8.45	2
Q96QA5	GSDMA	Gasdermin-A	49364	5.19	2
P61626	LYZ	Lysozyme C	16537	9.38	2
P04083	ANXA1	Annexin A1	38714	6.57	2

## Sheet: Spot1930
Spot 1930
Uniprot.Acc	Gene	Protein	MW	pI	Unique.peptides
P04264	KRT1	Keratin, type II cytoskeletal 1	66038	8.15	252
P35908	KRT2	Keratin, type II cytoskeletal 2 epidermal	65432	8.07	215
P13645	KRT10	Keratin, type I cytoskeletal 10	58826	5.13	193
P35527	KRT9	Keratin, type I cytoskeletal 9	62064	5.14	152
P08779	KRT16	Keratin, type I cytoskeletal 16	51267	4.98	68
P13647	KRT5	Keratin, type II cytoskeletal 5	62378	7.58	59
P02533	KRT14	Keratin, type I cytoskeletal 14	51561	5.09	53
Q04695	KRT17	Keratin, type I cytoskeletal 17	48105	4.97	15
P14923	JUP	Junction plakoglobin	81744	5.75	14
Q7Z794	KRT77	Keratin, type II cytoskeletal 1b	61901	5.73	12
P04259	KRT6B	Keratin, type II cytoskeletal 6B	60066	8.09	8
Q02413	DSG1	Desmoglein-1	113746	4.9	7
Q01995	TAGLN	Transgelin	22611	8.87	5
Q08188	TGM3	Protein-glutamine gamma-glutamyltransferase E	76631	5.62	3
P02538	KRT6A	Keratin, type II cytoskeletal 6A	60044	8.09	2
P19013	KRT4	Keratin, type II cytoskeletal 4	57285	6.25	2
P31944	CASP14	Caspase-14	27679	5.44	2
P12035	KRT3	Keratin, type II cytoskeletal 3	64416	6.12	2
P01040	CSTA	Cystatin-A	11006	5.38	2
Q8TD57	DNAH3	Dynein heavy chain 3, axonemal	470766	6.04	2
P35222	CTNNB1	Catenin beta-1	85496	5.53	2
P12273	PIP	Prolactin-inducible protein	16572	8.26	2
Q6PRD1	GPR179	Probable G-protein coupled receptor 179	257361	5.54	2
